# Supplementary material for: Effects of Different Yeasts on Physicochemical and Oenological Properties of Red Dragon Fruit Wine Fermented with Saccharomyces cerevisiae, Torulaspora delbrueckii and Lachancea thermotolerans
Source: PubMed Central journal article supplement (PMC7142936; doi:10.3390/microorganisms8030315), 2020-02-25
Supplement: microorganisms-08-00315-s001.pdf [file microorganisms-08-00315-s001.pdf]

Supplementary materials

**Effects of different yeasts on physicochemical and oenological properties of red dragon fruit wine fermented with *Saccharomyces cerevisiae*, *Torulaspora delbrueckii* and *Lachancea thermotolerans***

Xiaohui Jiang<sup>1</sup>, Yuyun Lu<sup>1\*</sup>, Shao Quan Liu<sup>1,2\*</sup>

<sup>1</sup> Department of Food Science and Technology, National University of Singapore, Science Drive 2, Singapore 117543, Singapore

<sup>2</sup> National University of Singapore (Suzhou) Research Institute, 377 Lin Quan Street, Suzhou Industrial Park, Jiangsu 215123, China

\*Corresponding author. Postal address: Department of Food Science and Technology, National University of Singapore, Science Drive 3, Singapore. Tel.: +65 6516 2687; fax: +65 6775 7895. E-mail address: fstluy@nus.edu.sg (Yuyun Lu); fstlsq@nus.edu.sg (Shao-Quan Liu)

**Table S1.** Major volatile compounds (GC-FID peak area x 10<sup>6</sup>) and their relative peak areas (RPA) identified in red dragon fruit juice and wines fermented with *Saccharomyces* and non-*Saccharomyces* yeast strains

| Volatile compounds        | LRI <sup>§</sup> | Day 0                     |       | Day 14                     |       |                             |       |                             |       | Organoleptics <sup>¶</sup>                  |
|---------------------------|------------------|---------------------------|-------|----------------------------|-------|-----------------------------|-------|-----------------------------|-------|---------------------------------------------|
|                           |                  | Peak area                 | RPA%  | Biodiva <sup>#</sup>       |       | Concerto <sup>#</sup>       |       | EC-1118 <sup>#</sup>        |       |                                             |
|                           |                  |                           |       | Peak area                  | RPA % | Peak area                   | RPA%  | Peak area                   | RPA % |                                             |
| <b>Acid</b>               |                  |                           |       |                            |       |                             |       |                             |       |                                             |
| Acetic acid               | 1453             | 1.27 ± 0.14 <sup>a</sup>  | 0.93  | 4.33 ± 0.37 <sup>b</sup>   | 0.10  | 5.85 ± 0.57 <sup>c</sup>    | 0.15  | 5.20 ± 0.49 <sup>c</sup>    | 0.13  | Acidic, pungent, vinegar-like               |
| Hexanoic acid             | 1836             | 20.00 ± 1.82 <sup>a</sup> | 14.60 | ND <sup>&amp;</sup>        |       | ND                          |       | ND                          |       | Cheesy, fruity, fatty                       |
| Octanoic acid             | 2052             | 9.71 ± 1.27 <sup>a</sup>  | 7.08  | 2.86 ± 0.17 <sup>b</sup>   | 0.06  | 2.06 ± 0.23 <sup>b</sup>    | 0.05  | 6.30 ± 0.46 <sup>c</sup>    | 0.15  | Acidic, cheesy, fruity                      |
| Nonanoic acid             | 2160             | 1.29 ± 0.42 <sup>a</sup>  | 0.94  | 0.26 ± 0.01 <sup>b</sup>   | 0.01  | ND                          |       | ND                          |       | Waxy, cheesy, dairy                         |
| Decanoic acid             | 2264             | ND                        |       | ND                         |       | ND                          |       | 2.29 ± 0.25                 | 0.06  | Fatty, coconut,                             |
|                           | Subtotal         | 32.28                     | 23.55 | 7.46                       | 0.17  | 7.92                        | 0.21  | 13.79                       | 0.33  |                                             |
| <b>Alcohols</b>           |                  |                           |       |                            |       |                             |       |                             |       |                                             |
| Ethanol                   | 992              | ND                        |       | 3959.6 ± 89.9 <sup>a</sup> | 89.50 | 3476.0 ± 275.5 <sup>b</sup> | 91.57 | 3780.1 ± 105.2 <sup>a</sup> | 90.95 | Alcoholic, solventy                         |
| 1-Propanol                | 1025             | ND                        |       | ND                         |       | 5.63 ± 0.63 <sup>a</sup>    | 0.15  | 10.79 ± 0.38 <sup>b</sup>   | 0.26  | Alcoholic, fruity, musty                    |
| Isoamyl alcohol           | 1229             | ND                        |       | 172.4 ± 9.7 <sup>a</sup>   | 3.90  | 108.5 ± 7.7 <sup>b</sup>    | 2.86  | 62.37 ± 3.35 <sup>c</sup>   | 1.50  | Alcoholic, whiskey, fruity, banana          |
| 1-Hexanol                 | 1371             | 79.24 ± 5.06 <sup>a</sup> | 57.81 | 4.06 ± 0.12 <sup>a</sup>   | 0.09  | ND                          |       | ND                          |       | Fusel oily, fruity, alcoholic, sweet, green |
| 2-Phenylethyl alcohol     | 2005             | ND                        |       | 172.2 ± 17.1 <sup>a</sup>  | 3.89  | 98.71 ± 3.83 <sup>b</sup>   | 2.60  | 78.74 ± 1.48 <sup>c</sup>   | 1.89  | Floral, rose, dried rose                    |
|                           | Subtotal         | 79.24                     | 57.81 | 4308.23                    | 97.38 | 3688.85                     | 97.18 | 3932.04                     | 94.61 |                                             |
| <b>Aldehydes</b>          |                  |                           |       |                            |       |                             |       |                             |       |                                             |
| Hexanal                   | 1085             | 11.60 ± 1.89 <sup>a</sup> | 8.46  | ND                         |       | ND                          |       | ND                          |       | Fresh, green, grass leafy                   |
| 2-Hexenal                 | 1222             | 2.01 ± 0.09 <sup>a</sup>  | 1.46  | ND                         |       | ND                          |       | ND                          |       | Fruity, green, leafy, vegetable             |
| Benzaldehyde              | 1538             | ND                        |       | 1.90 ± 0.14 <sup>a</sup>   | 0.04  | ND                          |       | ND                          |       | Almond like                                 |
| Phenyl acetaldehyde       | 1651             | 2.59 ± 0.23 <sup>a</sup>  | 1.89  | ND                         |       | ND                          |       | ND                          |       | Floral, sweet                               |
| 2,4-Dimethyl benzaldehyde | 1838             | ND                        |       | 0.26 ± 0.01 <sup>a</sup>   | 0.01  | ND                          |       | ND                          |       | Cherry, almond, spicy, vanilla              |
|                           | Subtotal         | 16.19                     | 11.81 | 2.16                       | 0.05  | ND                          |       | ND                          |       |                                             |

Table S1. Continued.

| Volatile compounds   | LRI <sup>s</sup> | Day 0       |       | Day 14                    |       |                           |       |                           |       | Organoleptics <sup>o</sup>                   |
|----------------------|------------------|-------------|-------|---------------------------|-------|---------------------------|-------|---------------------------|-------|----------------------------------------------|
|                      |                  | Peak area   | RPA % | Biodiva <sup>#</sup>      |       | Concerto <sup>#</sup>     |       | EC-1118 <sup>#</sup>      |       |                                              |
|                      |                  |             |       | Peak area                 | RPA % | Peak area                 | RPA % | Peak area                 | RPA % |                                              |
| <b>Ketones</b>       |                  |             |       |                           |       |                           |       |                           |       |                                              |
| 3-Hydroxy-2-butanone | 1305             | ND          |       | 1.14 ± 0.08 <sup>a</sup>  | 0.03  | ND                        |       | 4.50 ± 0.15 <sup>b</sup>  | 0.11  | Sweet, buttery, creamy, milky                |
| Ethylidene acetone   | 1391             | ND          |       | 0.74 ± 0.06 <sup>a</sup>  | 0.02  | ND                        |       | ND                        |       | Fruity, acetone, phenolic, fishy             |
|                      | Subtotal         | ND          |       | 1.89                      | 0.04  | ND                        |       | 4.50                      | 0.11  |                                              |
| <b>Ester</b>         |                  |             |       |                           |       |                           |       |                           |       |                                              |
| Ethyl acetate        | 968              | ND          |       | 15.88 ± 0.76 <sup>a</sup> | 0.36  | 25.58 ± 1.93 <sup>b</sup> | 0.67  | 15.78 ± 1.67 <sup>a</sup> | 0.38  | Ethereal, fruity, solventy                   |
| Isoamyl acetate      | 1115             | ND          |       | 19.06 ± 1.58 <sup>a</sup> | 0.43  | 9.42 ± 0.63 <sup>b</sup>  | 0.25  | 8.08 ± 0.7 <sup>b</sup>   | 0.19  | Sweet, banana, ripe                          |
| Methyl hexanoate     | 1174             | 2.16 ± 0.23 | 1.58  | ND                        |       | ND                        |       | ND                        |       | Fruity, pineapple, ethereal                  |
| Ethyl hexanoate      | 1215             | ND          |       | 20.93 ± 1.64 <sup>a</sup> | 0.00  | 32.54 ± 4.37 <sup>b</sup> | 0.86  | 41.93 ± 1.03 <sup>c</sup> | 1.01  | Sweet, fruity, pineapple, green              |
| Hexyl acetate        | 1262             | ND          |       | 5.69 ± 0.58 <sup>a</sup>  | 0.13  | ND                        |       | 5.78 ± 0.53 <sup>b</sup>  | 0.14  | Fruity, green, apple, banana, sweet          |
| Ethyl heptanoate     | 1320             | ND          |       | 0.52 ± 0.01 <sup>a</sup>  | 0.01  | 0.43 ± 0.01 <sup>b</sup>  | 0.01  | 0.48 ± 0.00 <sup>c</sup>  | 0.01  | Fruity, pineapple, cognac, rummy, winey      |
| Ethyl octanoate      | 1425             | 0.22 ± 0.08 | 0.16  | 16.58 ± 0.47 <sup>a</sup> | 0.37  | 12.94 ± 1.32 <sup>b</sup> | 0.34  | 83.55 ± 5.68 <sup>c</sup> | 2.01  | Fruity, pineapple, creamy, dairy             |
| Ethyl nonanoate      | 1523             | ND          |       | ND                        |       | 1.01 ± 0.12 <sup>a</sup>  | 0.03  | 0.60 ± 0.04 <sup>b</sup>  | 0.01  | Sweet, fruity, pear                          |
| Ethyl decanoate      | 1627             | ND          |       | 5.87 ± 0.35 <sup>a</sup>  | 0.13  | 2.61 ± 0.49 <sup>b</sup>  | 0.07  | 21.02 ± 1.45 <sup>c</sup> | 0.51  | Sweet, waxy, apple                           |
| Diethyl succinate    | 1670             | ND          |       | 0.24 ± 0.03 <sup>a</sup>  | 0.01  | 0.18 ± 0.02 <sup>b</sup>  | 0.00  | 0.18 ± 0.01 <sup>b</sup>  | 0.00  | Fruity, cooked apple, passion fruit          |
| Ethyl 9-decenoate    | 1681             | ND          |       | 0.28 ± 0.04 <sup>a</sup>  | 0.01  | ND                        |       | 0.64 ± 0.08 <sup>b</sup>  | 0.02  | Fruity, fatty<br>Sweet, floral, honey, rose, |
| Ethyl phenylacetate  | 1784             | ND          |       | 0.21 ± 0.03 <sup>a</sup>  | 0.00  | 0.30 ± 0.01 <sup>b</sup>  | 0.01  | 0.20 ± 0.02 <sup>a</sup>  | 0.00  | balsamic, cocoa                              |
| 2-Phenethyl acetate  | 1816             | ND          |       | 1.55 ± 0.12 <sup>a</sup>  | 0.04  | 0.45 ± 0.02 <sup>b</sup>  | 0.01  | 2.34 ± 0.17 <sup>c</sup>  | 0.06  | Floral, rose, sweet, honey, fruity, tropical |
| Ethyl dodecanoate    | 1834             | ND          |       | 5.88 ± 0.41 <sup>a</sup>  | 0.13  | 5.36 ± 0.39 <sup>a</sup>  | 0.14  | 12.94 ± 2.81 <sup>b</sup> | 0.31  | Sweet, waxy, fruity, apple, grape, brandy    |
| <b>Isobutyl</b>      |                  |             |       |                           |       |                           |       |                           |       |                                              |
| pentadecanoate       | 1855             | ND          |       | 0.34 ± 0.00 <sup>a</sup>  | 0.01  | ND                        |       | 0.62 ± 0.05 <sup>b</sup>  | 0.01  | Fatty                                        |

Table S1. Continued.

| Volatile compounds         | LRI <sup>§</sup> | Day 0                    |        | Day 14                   |        |                          |        |                          |        | Organoleptics <sup>o</sup>                                   |
|----------------------------|------------------|--------------------------|--------|--------------------------|--------|--------------------------|--------|--------------------------|--------|--------------------------------------------------------------|
|                            |                  | Peak area                | RPA %  | Biodiva <sup>#</sup>     |        | Concerto <sup>#</sup>    |        | EC-1118 <sup>#</sup>     |        |                                                              |
|                            |                  |                          |        | Peak area                | RPA %  | Peak area                | RPA %  | Peak area                | RPA %  |                                                              |
| 2-Phenethyl propionate     | 1884             | ND                       |        | 0.43 ± 0.08 <sup>a</sup> | 0.01   | ND                       |        | ND                       |        | Floral, rose, fruity, honey, balsamic                        |
| Ethyl myristate            | 2042             | ND                       |        | 2.21 ± 0.27 <sup>a</sup> | 0.05   | 1.61 ± 0.07 <sup>b</sup> | 0.04   | 2.63 ± 0.24 <sup>a</sup> | 0.06   | Sweet, waxy, violet<br>Waxy, fruity, creamy, milky, balsamic |
| Ethyl palmitate            | 2253             | ND                       |        | ND                       |        | ND                       |        | 1.51 ± 0.06 <sup>a</sup> | 0.04   |                                                              |
| Subtotal                   |                  | 2.37                     | 1.73   | 95.66                    | 1.69   | 92.44                    | 2.44   | 198.28                   | 4.77   |                                                              |
| <b>Terpene derivatives</b> |                  |                          |        |                          |        |                          |        |                          |        |                                                              |
| β-Myrcene                  | 1140             | 0.77 ± 0.09 <sup>a</sup> | 0.56   | 2.74 ± 0.33 <sup>b</sup> | 0.06   | 4.63 ± 0.52 <sup>c</sup> | 0.12   | 3.37 ± 0.32 <sup>d</sup> | 0.08   | Peppery, terpenic, spicy, balsamic                           |
| D-Limonene                 | 1170             | ND                       |        | 1.40 ± 0.09 <sup>a</sup> | 0.03   | ND                       |        | ND                       |        | Citrus, orange, fresh, sweet                                 |
| Linalool                   | 1539             | 4.96 ± 0.41 <sup>a</sup> | 3.62   | 0.77 ± 0.07 <sup>b</sup> | 0.02   | 0.90 ± 0.04 <sup>c</sup> | 0.02   | 0.65 ± 0.07 <sup>b</sup> | 0.02   | Citrus, floral, sweet, rose                                  |
| Longifolene                | 1554             | 0.94 ± 0.07 <sup>a</sup> | 0.69   | 3.47 ± 0.42 <sup>b</sup> | 0.08   | 1.26 ± 0.04 <sup>c</sup> | 0.03   | 1.33 ± 0.05 <sup>c</sup> | 0.03   | Sweet, woody, rose                                           |
| α-Terpineol                | 1697             | 0.30 ± 0.02 <sup>a</sup> | 0.22   | 0.20 ± 0.03 <sup>b</sup> | 0.00   | ND                       |        | ND                       |        | Pine, terpenic, lilac, citrus, woody, floral                 |
| Subtotal                   |                  | 6.98                     | 5.09   | 8.59                     | 0.19   | 6.80                     | 0.18   | 5.35                     | 0.13   |                                                              |
| <b>Phenols</b>             |                  |                          |        |                          |        |                          |        |                          |        |                                                              |
| 2-Methoxy-4-vinylphenol    | 2211             | ND                       |        | ND                       |        | ND                       |        | 2.12 ± 0.15 <sup>a</sup> | 0.05   | Woody, fresh, cedar, peanut                                  |
| <b>Total</b>               |                  | 137.06                   | 100.00 | 4423.98                  | 100.00 | 3796.00                  | 100.00 | 4156.08                  | 100.00 |                                                              |

<sup>§</sup> LRI: liner retention index determined in the DB-FFAP column.

<sup>#</sup> Biodiva, *Torulaspora delbrueckii*; Concerto, *Lachancea thermotolerance*; EC-1118, *Saccharomyces cerevisiae*.

<sup>o</sup> Organoleptic descriptors were obtained from <http://www.thegoodscentscompany.com> (accessed 8 October, 2018).

<sup>&</sup> ND: not detected.

<sup>a, b, c, d</sup> Statistical analysis ANOVA (n=3) at 95% confidence level with the same letter indicating no significant difference.
